# Supplementary material for: Control of HIV-1 replication in vitro by vaccine-induced human CD8+ T cells through conserved subdominant Pol epitopes
Source: PubMed Central journal article supplement (PMC4769096; doi:10.1016/j.vaccine.2015.12.021), 2016-02-24
Supplement: mmc1.pdf [file mmc1.pdf]

### Supplementary Table 1

Amino acid differences between the HIVconsv immunogen and HIV-1 isolates used in VIA

| HIVconsv immunogen/peptides |                              | Minimum epitope <sup>a</sup>       | HIV-1 IIIB <sup>b</sup>        | HIV-1 U455 <sup>b</sup>               |
|-----------------------------|------------------------------|------------------------------------|--------------------------------|---------------------------------------|
| Gag 3                       | EVIPMFTALSEGATP              | -                                  | EVIPMF <u>S</u> ALSEGATP       | EVIPMF <u>S</u> ALSEGATP              |
| Gag 17                      | GLNKIVRMYS <sup>U</sup> PSIL | -                                  | GLNKIVRMYS <u>P</u> TSIL       | GLNKIVRMYS <sup>U</sup> PSIL          |
| Gag 31                      | CTERQANFLGKIWPS              | <u>T</u> ERQANFL <u>L</u> RQANFLGK | CTERQANFLGKIWPS                | CTERQANFLGKIWPS                       |
| Pol 78                      | YFSVPLDEGFRKYTA              | SVPLDEGFRK                         | YFSVPLDE <u>D</u> FRKYTA       | YFSVPLDE <u>S</u> FRKYTA              |
| Pol 80                      | GFRKYTAFTIPSINN              | <u>T</u> AFTIPSI                   | <u>D</u> FRKYTAFTIPSINN        | <u>S</u> FRKYTAFTIPSINN               |
| Pol 88                      | GSPAIFQSSMTKILE              | AIFQSSMT <u>K</u>                  | GSPAIFQSSMTKILE                | GSP <u>S</u> IFQSSMTKILE              |
| Pol 93                      | KNPEIVYQYMDDLYV              | <u>Y</u> QYMDDLY <u>V</u>          | QNPDI <sup>U</sup> VIYQYMDDLYV | <u>Q</u> HPD <sup>U</sup> VIYQYMDDLYV |
| Pol 135                     | KLVSQGIRKVLFLDG              | KLVSQGIRKV                         | KLVS <u>A</u> GIRKVLFLDG       | KLVS <u>S</u> GIRKVLFLDG              |
| Pol 175                     | SDIKVVPRRKAKIIR              | -                                  | SDIKVVPRRKAKIIR                | SDIKVVPRRKAKIIR                       |

a – Bold underlined aa indicate anchor residues for restricting HLA molecules

b – Bold underlined aa indicate differences between the vaccine and the HIV-1 isolates used in VIA.

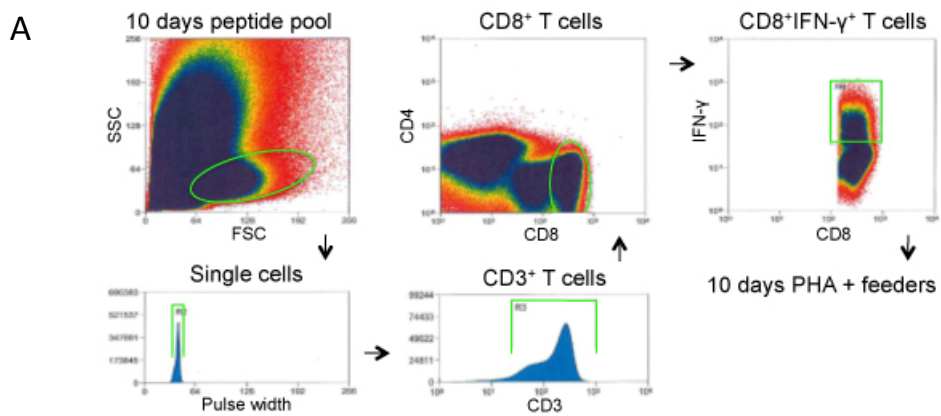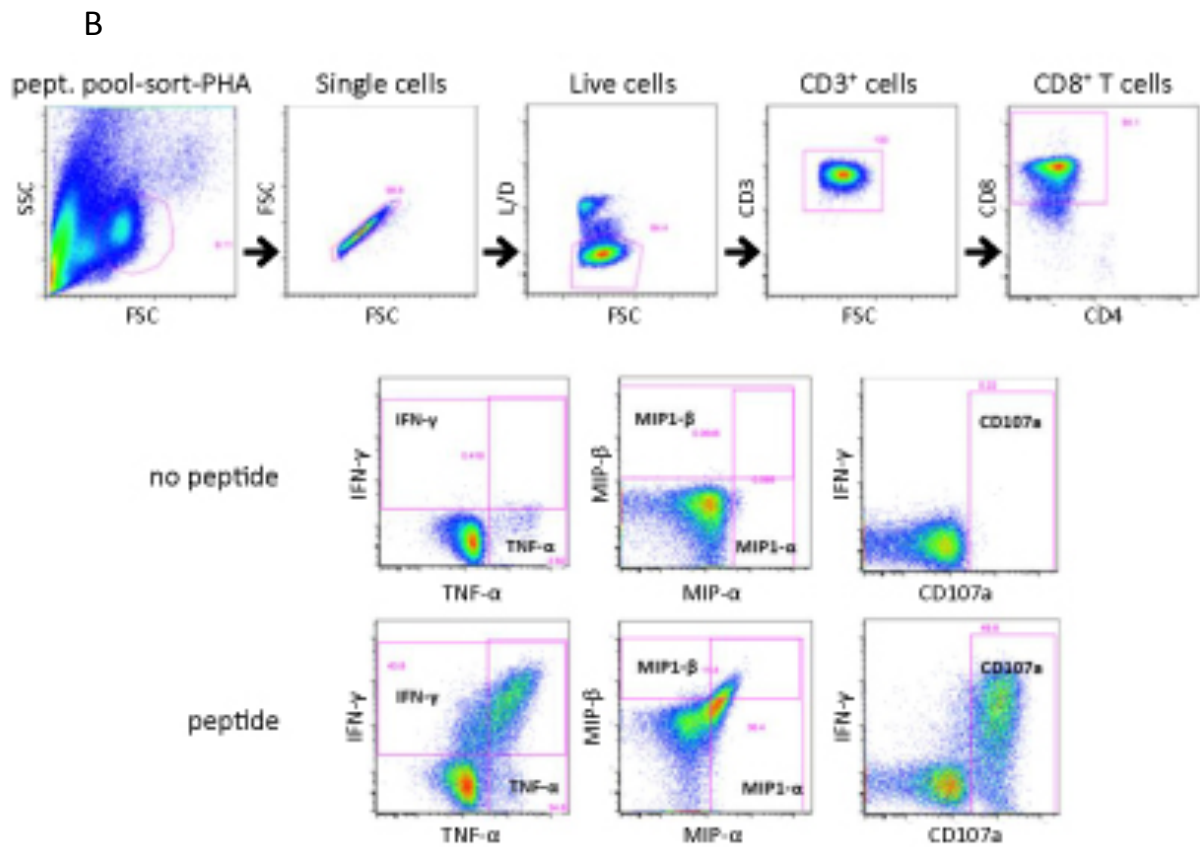

Suppl Fig. S1

**Supplementary Fig. S1.** (A) Expanded human effectors were derived from frozen PBMC samples. The PBMC were thawed and equal volume of R10 plus 50 U/ml benzonase nuclease (Novagen, Houston, USA) warmed to 37 °C was added dropwise. The cells re-suspended at a concentration of 1 to 3 x10<sup>6</sup> cells/ml in R10 with IL-7 at 25 ng/ml. To each well, 900 µl of cells along with 100 µl of 15 µg/ml peptides were plated, the cells and antigen were gently swirled to mix, PBS was added to empty wells to maintain humidity and the plates were incubated at 37 °C, 5% CO<sub>2</sub> for 10 days. On day 3 cells, were fed with IL-2 at a final concentration of 100 IU/ml. On day 7, R10 media and IL-2 were added to the plate to give 100 IU/ml of IL-2 in 2 ml. On day 10, the cells were washed 3x with R10, re-suspended in 1 ml of R10 and placed with loose lids at 37 °C, 5% CO<sub>2</sub> for 48 hours to rest. Cells were stimulated for 3 hours with the peptide pool (10 µg/ml), and CD8<sup>+</sup> IFN- $\gamma$  producing cells identified using the IFN- $\gamma$  capture assay, (130-054-202; Miltenyi Biotec, Bisley, UK) together with cell surface staining with anti-CD8 APC, anti-CD3 APC-Cy7 and anti-CD4 PerCP to facilitate HIV-1-specific CD8<sup>+</sup> T-cell isolation. IFN- $\gamma$  producing CD3<sup>+</sup>CD4<sup>-</sup>CD8<sup>+</sup> cells were sorted using a MoFlo cell sorter (DakoCytomation, Glostrup, Denmark). Feeder cells from 3 healthy donors were prepared on the day of cell sorting, re-suspended in 10 ml R10 and placed in 25-cm<sup>2</sup> tissue culture flasks for irradiation at 50 gray per flask. Once irradiated, the cells were mixed in a 50 ml falcon tube and washed with 50 ml R10 at 1,500 rpm for 10 minutes, resuspended and diluted to 2x10<sup>6</sup>/ml in R10 and PHA (40 µg/ml), and incubated at 37 °C, 5% CO<sub>2</sub> until sorting. Once Gag- and Pol-specific cells were sorted into 100 µl of R10, 1 ml of feeder cells was added and the total volume was plated into a single well of a 24-well flat-bottomed tissue culture plate and maintained at 37 °C, 5% CO<sub>2</sub>. Expanded cells were fed with R10/IL-2 at 200 IU/ml as required, or IL-2 alone if growth was slow. On day 13, expanded cells were re-stimulated using irradiated PBMC prepared as described above. Cell lines were transferred to 15-ml falcon tubes, washed in 10 ml R10 and counted. Cell lines were then pelleted by centrifugation at 1,500 rpm 10 minutes, feeders were added directly to give a feeder-to- ratio of 2:1 and the cultures were then plated into 12-well plates and fed with R10/IL-2 at 200 IU/ml as required. On day 14, expanded cells were ready for use and a sample was stained for cell purity and antigen specificity. Day-14 expanded cells were tested by cultured VIA.

(B) An example of sequential gating for cytokine and chemokine production shown in Fig. 2B and C. Gag- and Pol-specific expanded effectors were resuspended in R10 medium at 10<sup>6</sup> cells/ml. The cells were labelled with anti-CD107a-PE-Cy7 (BD Biosciences, Hatfield, UK), stimulated with 1.5 µg/ml of each individual peptide, 1 µg/ml SEB (positive control) or R10 (negative control) and 1 µg/ml of anti-CD28 and anti-CD49d. Then, 10 µg/ml of GolgiPlug (BD Biosciences, San Jose, USA) and 0.7 µl/ml of GolgiStop (BD Biosciences, San Jose, USA) were also added and plates were incubated for 6 hours at 37 °C, 5% CO<sub>2</sub>. The next day, cells were stained with the surface antibodies anti-CD8 APC-eFluor780 (47-0087-42; eBioscience, San Jose, USA), anti-CD4 BV570 (300533; Biolegend, London, UK) and Aqua Live/Dead (Invitrogen, Grand Island, USA) for 30 minutes at 4 °C. Cells were then washed and permeabilized with cytofix/cytoperm solution (BD Biosciences, San Jose, USA) and intracellular staining was performed using anti-MIP-1 $\alpha$  PerCP-eFluor 710 (46-7539; eBioscience, Hatfield, UK), anti-MIP-1 $\beta$ -Alexa Fluor 700 (561278; BD Biosciences, San Jose, USA), anti-TNF- $\alpha$  APC (562084; BD Bioscience, San Jose, USA), anti-IFN- $\gamma$  V450 (560371; BD Biosciences, San Jose, USA) and anti-CD3 ECD (A07748; Beckman Coulter, Dusseldorf, UK) for 30 minutes at 4 °C. Cells were then washed twice in FACS buffer and fixed in 1% paraformaldehyde before being acquired on the BD LSRII flow cytometer (BD Biosciences, San Jose, USA). Data analysis was performed using FlowJo software (Tree Star Inc., Ashland, USA) version 9.5.

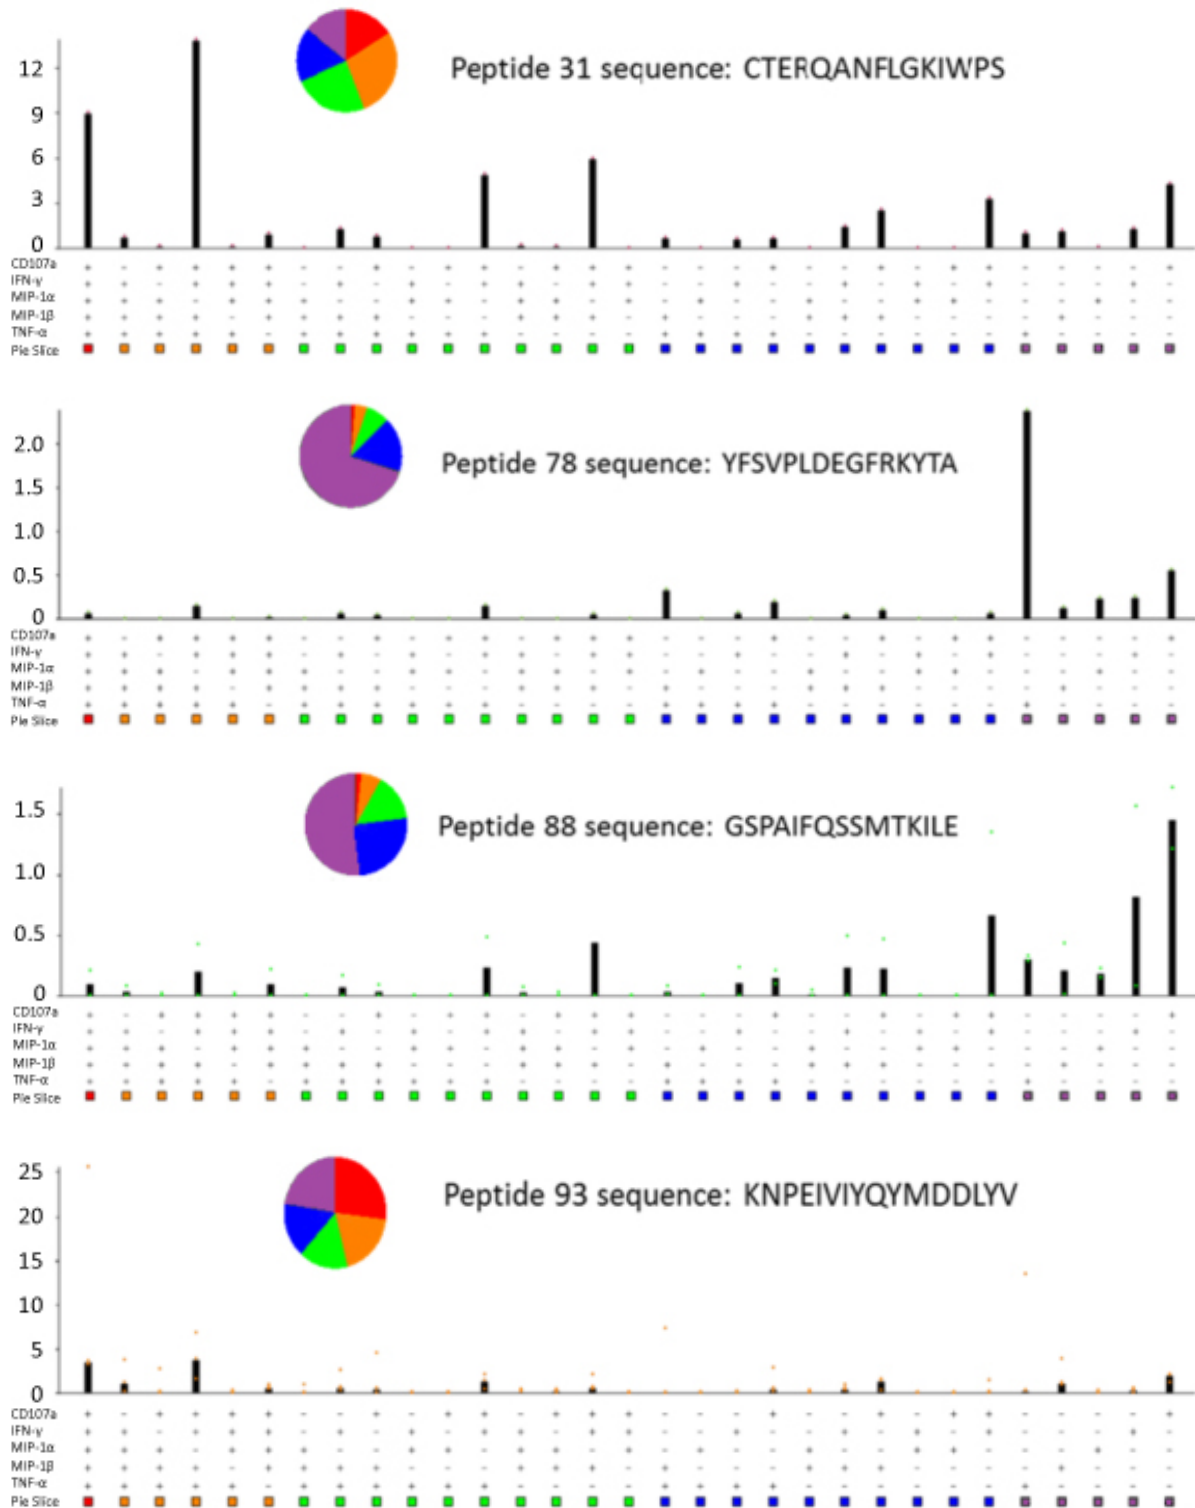

**Supplementary Fig. S2.** SPICE graphs for average oligofunctionality of HIV/consv vaccine-induced, Gag and Pol pool-expanded human effectors specific for individual peptides. Rested STCL cultures were stimulated with individual peptides in an ICS assay. Peptide sequences are shown above each graph. Number of functions: 1 – purple, 2 – blue, 3 – green, 4 - orange and 5 – red.

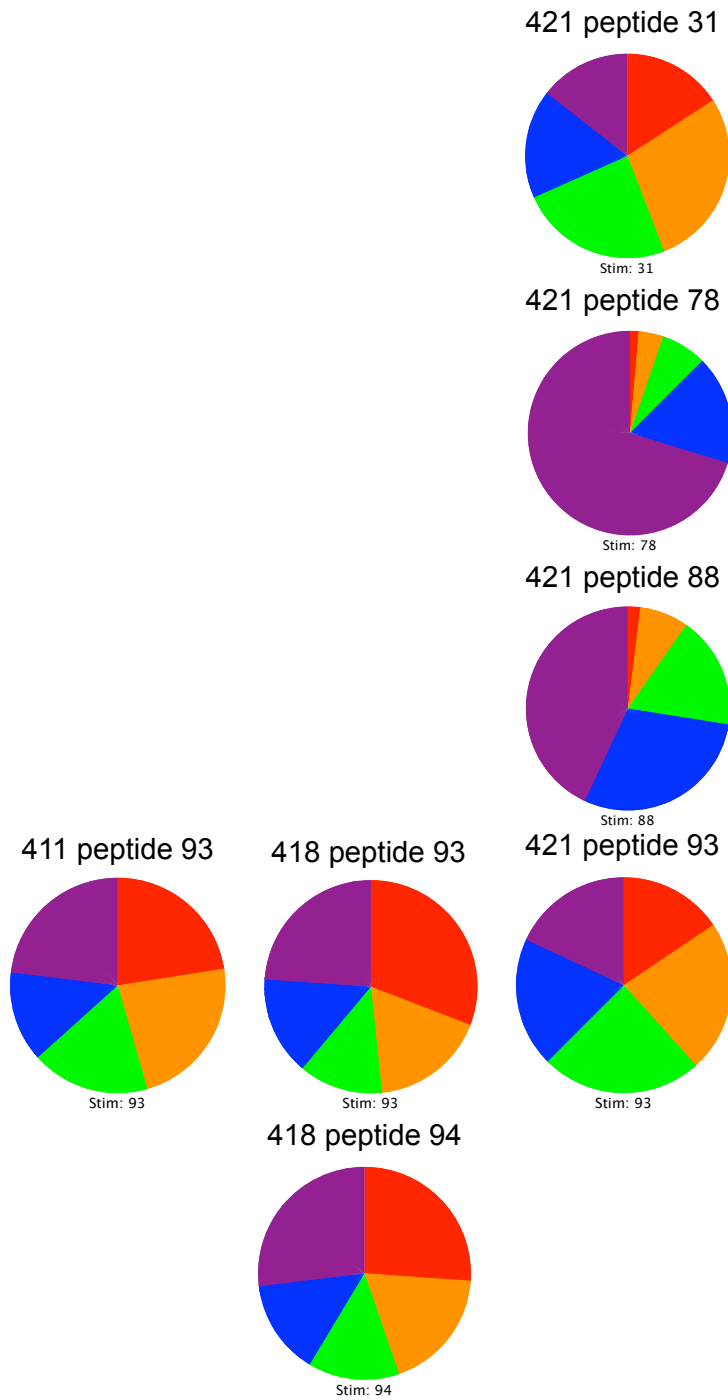

**Supplementary Fig. S3.** Pie charts depicting oligofunctionality of Gag and Pol pool-expanded human effectors induced in volunteers 411, 418 and 421 specific for individual peptides. Rested short-term cell cultures were assessed in an ICS assay for their specificity and functionality using a single peptide restimulation. Volunteer and peptide numbers are shown above charts. Number of functions: 1 – purple, 2 – blue, 3 – green, 4 – orange and 5 – red.

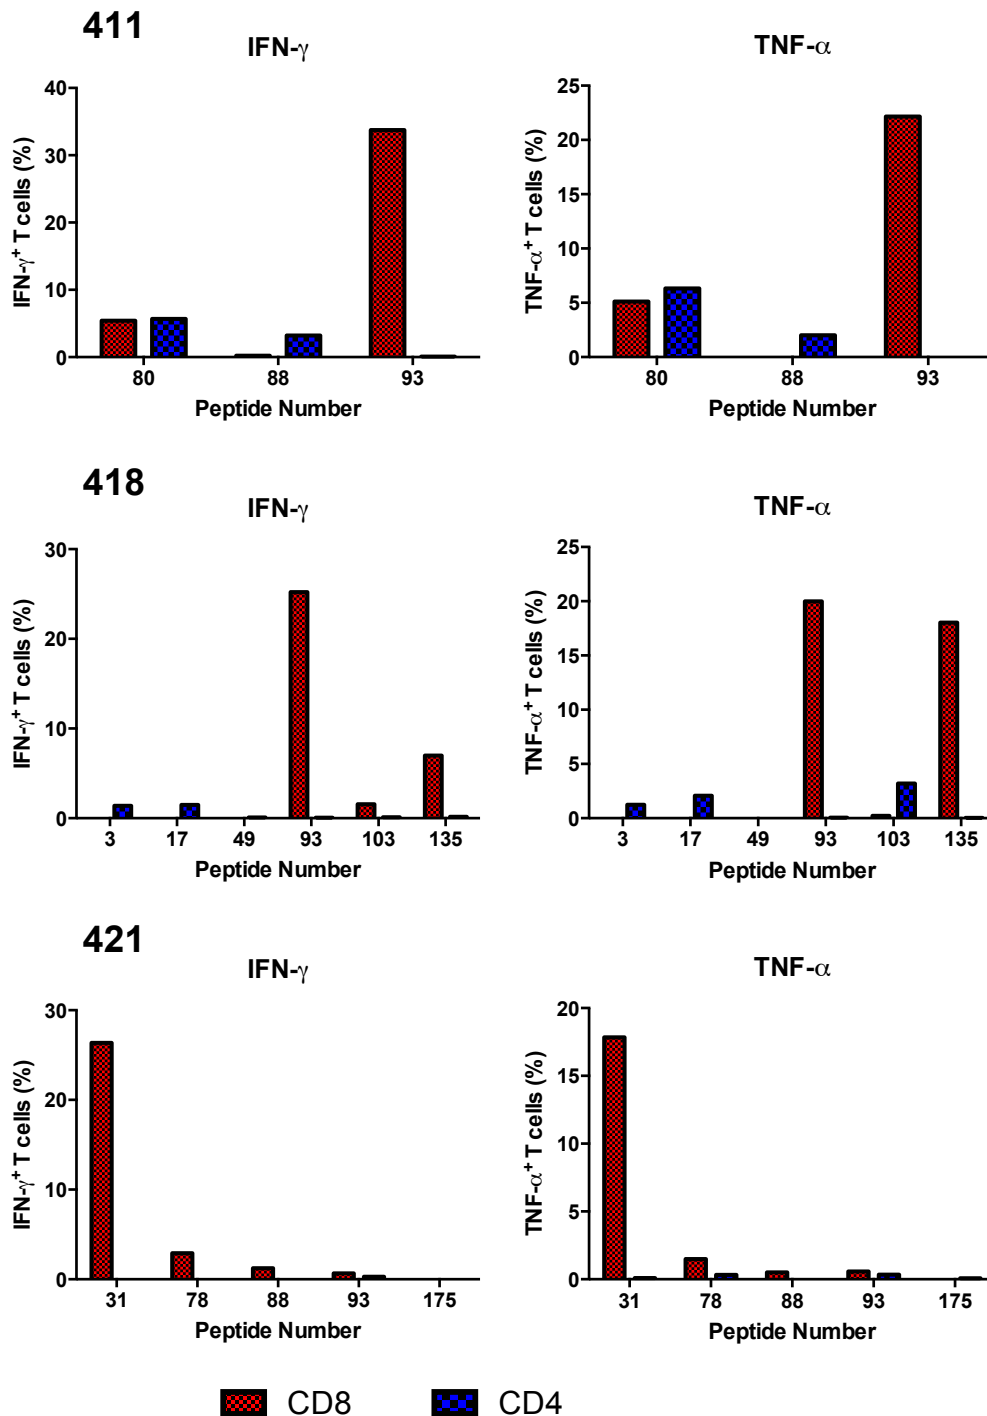

**Supplementary Fig. S4.** Relative frequencies of single peptide-expanded CD8<sup>+</sup> and CD4<sup>+</sup> T-cell responses. HIVconsv vaccine-elicited human CD8<sup>+</sup> T cell effectors were expanded using individual 'parental' 15-mer peptides. Cells were rested and then stimulated with progressively truncated peptides for 6 hours as shown in Fig. 6a. The frequencies of strongest short-peptide responses are shown.

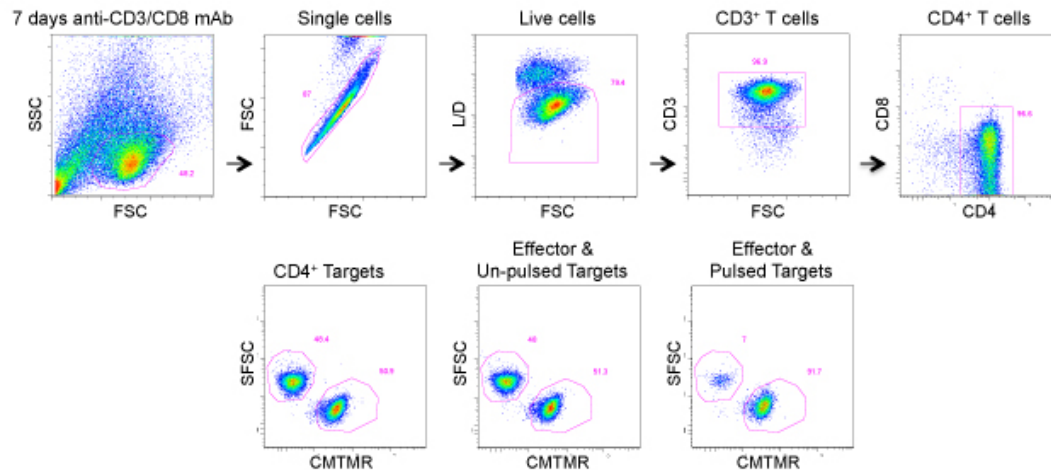

**Supplementary Fig. S5.** Determining the level of killing in Fig. 3. Gag- and Pol-specific expanded human effectors from day 15 were tested in an *in vitro* cell killing assay. Briefly, CD4<sup>+</sup> T cells expanded by anti-CD3/CD8 bi-specific antibody were separated into 1x 50 ml falcon tube for pulsed cells, and 2x 15-ml falcon tubes for un-pulsed and unstained cells. Cells for peptide-pulsing were re-suspended at 2x10<sup>6</sup>/ml in PBS and were stained with 8 nM CFSE (65-0850-84; eBiosciences, Hatfield, UK) by adding an equal volume of CFSE stain to cell suspension for 10 minutes in the dark at 18-24 °C. Un-pulsed cells were stained with cell tracker orange, CMTMR (C2927, Invitrogen, Grand Island, USA) reconstituted to a 10 mM solution and diluted by adding 8 µl into 10 ml R10 to give a working stock. Samples were placed, with loose lids at 37 °C, 5% CO<sub>2</sub> for 12 minutes, after which they were centrifuged to remove the stain and re-suspended in R10 at 2x10<sup>6</sup>/ml before being place back at 37 °C, 5% CO<sub>2</sub> for a further 15 minutes. For all cells, the reaction was quenched by 5x volume of FCS added to all tubes for 5 minutes on ice. Cells were then washed 3x in R10, re-suspended in R10 at 2x10<sup>6</sup>/ml and counted by trypan blue exclusion dye. CFSE-stained cells were then divided into relevant number of tubes for pulsing with individual peptides and un-pulsed CFSE-labeled cells were included as a control. Cells were centrifuged and supernatant removed, peptides were added at 2x concentration (3 µg/ml), directly to the re-suspended cell pellet and all samples were placed with lids loose at 37 °C, 5% CO<sub>2</sub> for 2 hours, washed 3x and re-suspended at 1x10<sup>6</sup>/ml and added to assay wells to give 50,000 pulsed and 50,000 un-pulsed per well. Effector Gag- and Pol-specific CD8<sup>+</sup> T-cell lines were washed, diluted to 10<sup>7</sup> cells/ml and added into assay wells to give a 10:1 effector to target ratio. All wells were made to 200 µl volume and empty wells were filled with PBS. The plate was cultured overnight at 37 °C, 5% CO<sub>2</sub>. The next day, cells were washed, re-suspended in 200 µl FACS buffer, stained with Live/Dead Violet (L34955; Invitrogen, Grand Island, USA) and anti-CD8 APC for 20 minutes at 18-24 °C in the dark, washed in 200 µl FACS buffer and re-suspended in 200 µl 1% paraformaldehyde and acquired on the CyAn ADP flow cytometer (Beckman Coulter, Dustable, UK). Data analysis was performed using FlowJo software version 9.5 (Tree Star Inc. Ashland, OR, USA).
